# Supplementary material for: Enhancement in the linear electrical properties and thermal stability of chromite perovskites through entropy engineering
Source: Royal Society of Chemistry journal article supplement (doi:10.1039/d4tc01334d), 2024-01-01

## Supplementary Information

### Enhancement linear electrical properties and thermal stability of chromite perovskites through entropy engineering

Yunfei Wang<sup>a,b,‡</sup>, Hao Sun<sup>a,d,‡</sup>, Yang Zhou<sup>c</sup>, Ruifeng Wu<sup>a,d</sup>, Yafei Liu<sup>a,d</sup>, Lili Zhi<sup>b</sup>, Aimin Chang<sup>a</sup>, Bo Zhang<sup>a,\*</sup>

<sup>a</sup>State Key Laboratory of Functional Materials and Devices for Special Environmental Conditions,  
Xinjiang Key Laboratory of Electronic Information Materials and Devices, Xinjiang Technical Institute  
of Physics & Chemistry of CAS, Urumqi 830011, China

<sup>b</sup>School of Physics and Materials Science, Changji University, Changji 831100, China

<sup>c</sup>SOOK High Tech (JiangSu) Co., Ltd, Yangzhou 225600, China

<sup>d</sup>University of Chinese Academy of Sciences, Beijing 100049, China

<sup>‡</sup>These authors contributed equally to this work and should be considered co-first authors.

\*Corresponding author: zhangbocas@ms.xjb.ac.cn (Bo Zhang)

**Table S1.** The elemental composition of  $\text{LaCrO}_{3-\delta}$  and  $(5\text{RE}_{0.2})\text{CrO}_{3-\delta}$ .

| Sample                                    | Element concentration [at.%] and the ratio of A site element and Cr |      |      |      |      |       |        | Real composition                                                                                                     |
|-------------------------------------------|---------------------------------------------------------------------|------|------|------|------|-------|--------|----------------------------------------------------------------------------------------------------------------------|
|                                           | La                                                                  | Nd   | Sm   | Gd   | Y    | Cr    | A:Cr   |                                                                                                                      |
| $\text{LaCrO}_{3-\delta}$                 | 18.96                                                               | -    | -    | -    | -    | 21.03 | 0.90:1 | $\text{La}_{0.90}\text{CrO}_{3-\delta}$                                                                              |
| $(5\text{RE}_{0.2})\text{CrO}_{3-\delta}$ | 4.07                                                                | 4.40 | 4.44 | 3.55 | 5.32 | 20.86 | 1:0.95 | $\text{La}_{0.19}\text{Nd}_{0.20}\text{Sm}_{0.20}\text{Gd}_{0.16}\text{Y}_{0.24}\text{Cr}_{0.95}\text{O}_{3-\delta}$ |

**Table S2.** Impedance spectrum fitting results for  $\text{LaCrO}_{3-\delta}$  and  $(5\text{RE}_{0.2})\text{CrO}_{3-\delta}$ .

| Compound                                  | $R_1$ ( $\Omega$ ) | $C_1$ (F) | $R_2$ ( $\Omega$ ) | $C_2$ (F) |
|-------------------------------------------|--------------------|-----------|--------------------|-----------|
| $\text{LaCrO}_{3-\delta}$                 | 274                | 1.690E-9  | /                  | /         |
| $(5\text{RE}_{0.2})\text{CrO}_{3-\delta}$ | 3931               | 7.163E-10 | 1897               | 1.133E-8  |

Figure S1. XRD pattern and refinement results for  $\text{LaCrO}_{3-\delta}$ .

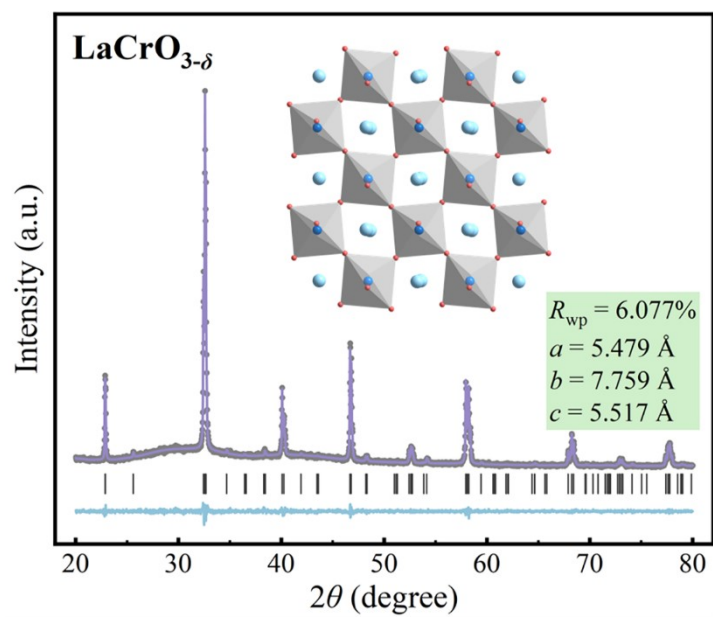

**Figure S2.** (a, b) SEM-EDS element mapping, and (c) atomic ratio distribution of  $\text{LaCrO}_{3-\delta}$  and  $(\text{5RE}_{0.2})\text{CrO}_{3-\delta}$  ceramic.

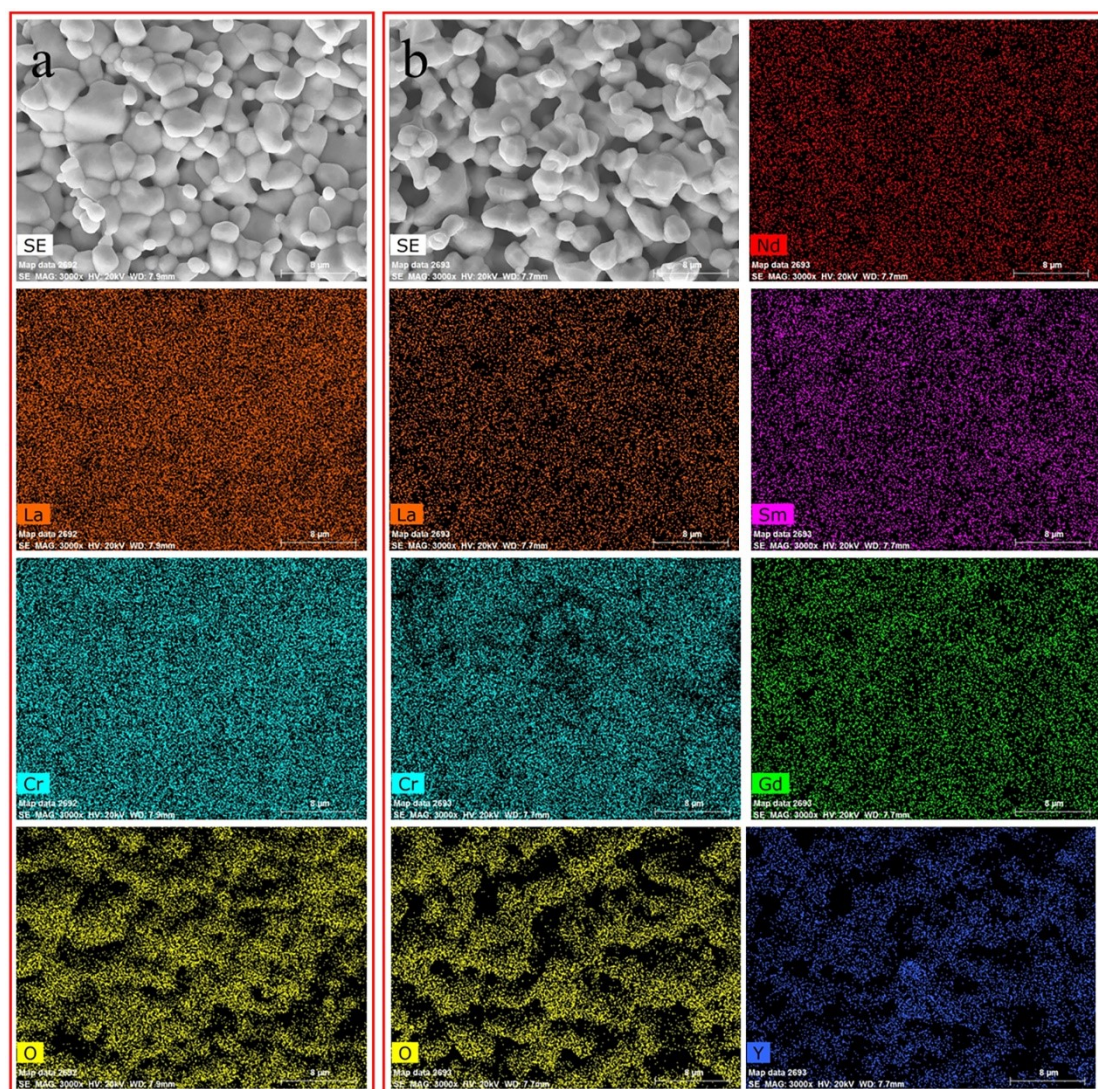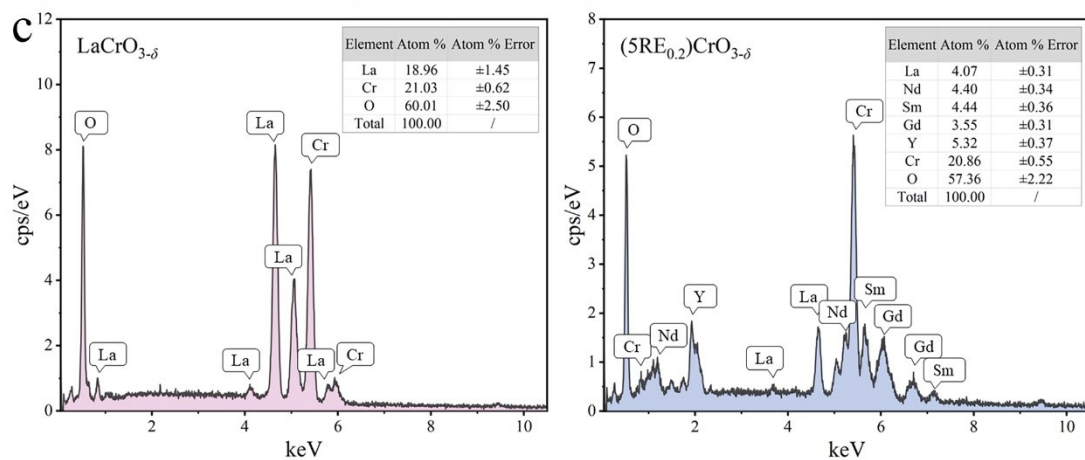

**Figure S3.** Geometric phase analysis plots and statistics of  $(5\text{RE}_{0.2})\text{CrO}_{3-\delta}$  along the  $xx$  and  $yy$  directions.

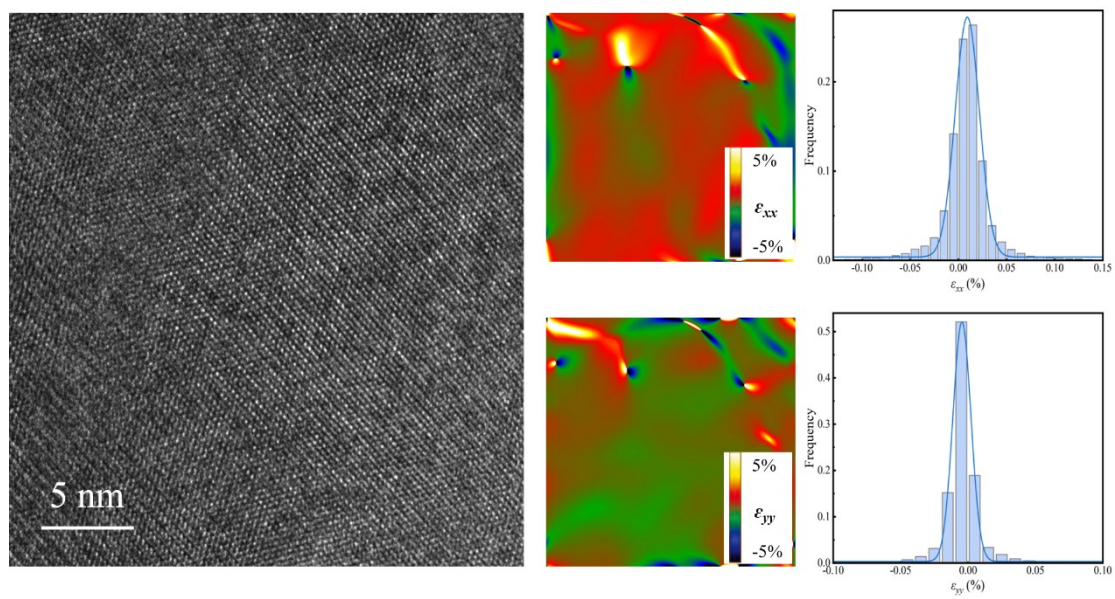

Supplement: d4tc01334d1.pdf [file d4tc01334d1.pdf]
